# Supplementary material
Source: publisher figshare collection journal article supplement (https://rs.figshare.com/ndownloader/files/15511097)
Supplement: Supplementary file 1 [file 15511097]

## Sheet: TableS1
Table S1. List of all toxins and whether they were found to be significant outliers across multiple tests.
Toxin	Toxin Outlier Analysis
	Tajima's D	Tajima's Direction	Global FST	Phylo East vs. West FST	Geo East vs. West FST	North Mojave vs. South Mojave FST	North Mojave vs. Colorado FST	North Mojave vs. Sonora FST	South Mojave vs. Colorado FST	South Mojave vs. Sonora FST	Colorado vs. Sonora FST	SUM
3FTx-1				TRUE	TRUE	TRUE		TRUE		TRUE		5
3FTx-2				TRUE	TRUE							2
BPP-1												0
CRISP-1	TRUE	+	TRUE	TRUE						TRUE		4
CTL-1	TRUE	–										1
CTL-2												0
CTL-3												0
CTL-4												0
CTL-5												0
CTL-6												0
CTL-7												0
CTL-8												0
CTL-9	TRUE	+				TRUE				TRUE		3
CTL-10												0
CTL-11	TRUE	+										1
Ficolin-1												0
Ficolin-2												0
FusedToxin-1												0
HYAL-1												0
KUN-1				TRUE								1
LAAO-1												0
MYO-1												0
MYO-2												0
NGF-1												0
NUC-1												0
PDE-1												0
PLA2-1			TRUE									1
SVMPII-1												0
SVMPII-2												0
SVMPII-3												0
SVMPII-4												0
SVMPII-5												0
SVMPII-6						TRUE						1
SVMPIII-1												0
SVMPIII-2												0
SVMPIII-3												0
SVMPIII-4												0
SVMPIII-5												0
SVMPIII-6												0
SVMPIII-7	TRUE	–										1
SVMPIII-8												0
SVMPIII-9												0
SVMPIII-10												0
SVSP-1										TRUE		1
SVSP-2												0
SVSP-3												0
SVSP-4												0
SVSP-5												0
SVSP-6												0
SVSP-7					TRUE							1
SVSP-8												0
SVSP-9												0
SVSP-10	TRUE	+	TRUE	TRUE	TRUE			TRUE				5
SVSP-11												0
SVSP-12												0
SVSP-13												0
SVSP-14												0
SVSP-15												0
VEGF-1												0
VEGF-2												0
Vespryn-1												0
Waprin-1												0

## Sheet: TableS2
Table S2. Allele specific single nucleotide polymorphisms (SNPs) from toxin genes found to show signatures of selection or differentiation between populations. Amino acid change indicates nonsynonymous or nonsense (*) mutations with (-) indicating a synonymous change.
		3FTx-1			3FTx-2	CRISP-1		CTL-1				CTL-2		CTL-9			CTL-11				KUN-1				PLA2-1			SVMPII-1																SVMPII-4
	ID	111	249	278	135	383	468	96	141	240	297	40	166	143	144	441	39	245	355	401	441	557	744	748	242	361	385	157	161	261	543	655	718	898	900	939	940	1013	1201	1257	1308	1314	1398	21	38	82	102	294	424
North Mojave	CLP2065	G	T	G	T	C	G	T	A	C	C	G	A	A	G	A	T	A	G	G	T	G	C	T	T	A	G	A	T	T	G	C	C	A	G	A	C	A	A	G	A	G	C	A	T	A	C	A	A
		G	T	G	T	C	G	T	A	C	C	G	A	A	G	A	T	A	G	G	T	G	C	T	T	A	G	A	C	T	G	C	C	A	G	A	C	A	A	G	A	G	C	A	T	A	C	A	A
	CLP2068	G	T	G	-	C	G	C	A	T	C	G	A	A	G	A	T	G	C	T	T	G	C	T	T	A	G	A	C	T	G	C	C	A	G	A	A	A	A	G	A	G	C	A	T	A	C	A	A
		G	T	G	-	C	G	T	A	C	C	G	A	G	C	A	T	G	C	T	T	G	C	T	T	A	G	A	C	T	G	C	C	A	G	C	C	A	A	G	A	G	T	A	T	A	C	A	A
South Mojave	CLP2071	G	T	G	T	C	G	T	A	C	C	G	A	G	C	G	C	G	C	T	T	G	C	T	C	A	G	G	C	C	G	T	C	G	A	C	C	G	G	G	T	A	C	G	T	A	C	A	A
		A	T	G	T	C	G	T	A	C	C	G	A	G	C	G	C	G	C	T	T	G	C	T	C	A	G	G	C	T	G	C	C	A	G	C	C	A	A	G	A	G	C	A	T	G	C	G	G
	CLP2109	-	-	-	-	C	G	T	A	C	C	A	A	G	C	G	-	-	-	-	T	G	C	T	T	A	G	G	C	C	G	C	C	A	G	A	A	A	A	G	A	G	C	A	T	G	C	A	A
		-	-	-	-	C	G	T	A	C	C	A	A	G	C	G	-	-	-	-	T	G	T	T	T	A	G	G	C	T	G	C	T	A	G	A	A	A	A	G	A	G	C	A	T	A	C	A	A
Colorado	CLP2057	-	-	-	-	T	A	T	A	C	C	G	T	-	-	-	-	-	-	-	C	A	C	T	C	G	A	A	T	C	G	T	C	G	G	C	C	G	G	G	A	G	C	A	T	G	C	G	A
		-	-	-	-	T	A	T	A	C	C	G	T	-	-	-	-	-	-	-	C	A	C	T	C	G	A	A	T	C	G	T	C	G	G	C	C	G	G	G	A	G	C	A	T	G	C	G	A
Sonora	CLP2105	-	-	-	-	T	G	T	A	C	C	A	T	A	G	G	-	-	-	-	C	A	C	C	C	A	G	G	C	C	G	C	C	G	G	C	C	G	A	G	A	G	C	A	T	G	C	A	A
		-	-	-	-	T	G	T	A	C	C	G	T	A	G	G	-	-	-	-	C	A	C	C	C	A	G	G	C	C	T	T	C	G	G	C	C	G	G	G	T	A	C	A	C	G	C	A	A
	CLP2137	G	C	C	C	T	A	T	A	C	C	A	T	A	G	G	-	-	-	-	C	A	C	T	T	A	G	G	C	C	G	T	C	G	G	C	C	G	G	G	T	A	C	A	C	G	C	G	A
		G	C	C	C	T	G	T	T	C	T	G	A	A	G	G	-	-	-	-	C	A	C	C	T	A	G	G	C	C	T	T	C	G	G	C	C	G	G	G	T	A	C	A	C	G	C	A	A
	KW1744	G	C	C	-	T	A	T	A	C	C	G	T	A	G	G	-	-	-	-	C	A	C	T	C	A	G	G	C	C	G	T	C	G	A	C	C	G	G	G	T	A	C	A	C	G	C	G	A
		G	C	C	-	T	A	T	A	C	C	G	T	A	G	G	-	-	-	-	C	A	C	T	T	A	G	G	C	C	G	C	C	G	G	C	C	G	A	A	A	G	C	A	C	G	G	A	A
Amino Acid Change		-	-	S > *	-	L > P	-	-	E > D	-	-	M > V	S > T	S > N	S > R	-	-	S > N	Q > E	L > R	-	H > R	-	Y > H	T > I	D > N	K > E	N > D	I > T	-	K > N	W > R	-	V > M	-	-	Q > K	R > H	G > R	-	E > D	-	-	-	V > A	V > M	-	-	K > E
		SVMPII-4									SVMPII-5											SVMPII-6													SVMPIII-4							SVMPIII-5
	ID	455	463	615	848	849	1091	1451	1452	1699	58	139	455	463	481	496	627	922	1212	1376	1394	246	369	424	430	437	496	591	716	886	888	916	971	1355	82	159	161	401	581	977	1511	79	110	119	159	232	288	359	554
North Mojave	CLP2065	A	G	T	A	A	A	G	C	G	T	G	T	A	G	G	C	A	A	G	G	T	T	G	T	A	G	C	G	C	C	A	T	T	A	C	C	A	C	T	G	A	A	C	C	G	C	G	C
		A	G	T	A	A	A	G	C	G	T	G	T	A	G	G	C	A	A	G	G	T	T	G	T	A	G	C	G	C	C	A	T	T	A	C	C	A	C	T	G	A	A	C	C	G	C	G	C
	CLP2068	A	G	T	A	A	A	G	C	G	T	G	T	A	G	G	C	A	A	G	G	T	T	G	T	A	G	C	G	C	C	A	T	T	A	C	C	A	C	T	G	A	A	C	C	G	C	G	C
		A	G	T	A	A	A	G	C	G	T	G	T	A	G	G	C	A	A	G	A	T	T	G	T	A	G	C	G	C	C	A	T	T	A	C	C	A	C	T	G	A	A	C	C	G	C	G	C
South Mojave	CLP2071	T	A	T	G	T	C	G	T	G	T	G	A	G	A	A	C	A	A	G	G	-	-	-	-	-	-	-	-	-	-	-	-	-	A	C	C	A	C	T	G	A	G	C	C	T	C	G	C
		A	G	T	G	T	C	G	T	G	T	G	T	A	A	A	C	T	G	A	G	-	-	-	-	-	-	-	-	-	-	-	-	-	A	C	C	G	A	T	A	A	G	C	C	T	C	G	T
	CLP2109	A	G	T	A	A	A	G	C	G	T	G	T	A	A	G	C	A	A	G	G	T	T	G	T	A	G	C	G	C	C	A	T	T	A	C	C	A	C	T	G	A	A	C	C	G	C	G	C
		A	G	C	G	T	A	G	C	G	T	G	T	A	A	G	C	A	A	G	G	C	T	G	T	A	G	C	G	C	C	A	T	C	A	C	C	A	C	T	G	G	G	T	C	T	C	A	T
Colorado	CLP2057	A	G	T	G	T	C	G	T	G	-	-	-	-	-	-	-	-	-	-	-	T	C	G	T	A	A	T	G	T	C	G	T	C	A	T	T	G	A	T	G	A	G	C	C	T	C	G	C
		A	G	T	G	T	C	G	T	G	-	-	-	-	-	-	-	-	-	-	-	T	C	G	T	A	A	T	G	T	C	G	T	C	A	T	T	G	C	T	G	A	G	C	C	T	T	G	C
Sonora	CLP2105	A	G	T	G	T	C	G	T	G	G	A	A	G	A	A	C	A	A	G	G	T	T	G	T	A	G	C	G	T	T	A	T	C	A	C	C	A	C	T	G	A	G	C	C	T	C	G	C
		A	G	T	G	T	A	G	C	G	G	A	A	G	A	A	C	A	A	G	G	T	T	G	T	A	G	T	G	C	C	A	T	C	G	C	C	A	C	T	G	A	G	C	C	T	C	G	C
	CLP2137	T	A	T	G	T	C	G	C	G	G	A	A	G	A	A	C	A	A	G	G	T	C	G	T	A	A	T	G	C	T	A	T	C	A	C	C	A	C	T	G	A	G	C	C	T	C	G	C
		A	G	T	G	T	C	A	T	G	T	A	A	G	A	A	T	A	A	G	G	T	C	G	T	A	A	T	G	C	T	A	T	C	A	C	C	A	C	T	G	A	A	C	C	T	C	G	C
	KW1744	A	G	T	G	T	C	G	C	A	T	G	A	G	A	A	C	A	A	G	G	T	T	A	C	G	A	T	C	C	T	A	C	C	A	C	T	G	A	T	G	A	G	C	C	T	C	G	C
		A	G	T	G	T	A	G	T	G	T	G	A	G	A	A	C	A	A	G	G	T	T	A	C	G	G	C	G	C	C	A	T	C	A	C	T	G	A	C	G	A	G	C	G	T	C	G	C
Amino Acid Change		Y > F	E > K	-	S > N	S > R	P > H	R > H	-	G > R	A > S	I > V	Y > F	E > K	N > D	M > V	-	N > Y	-	G > D	R > H	-	-	E > K	S > P	N > S	V > M	-	R > P	L > F	-	I > V	L > P	M > T	M > V	-	V > A	G > E	K > T	I > T	R > Q	N > D	R > Q	T > I	D > E	S > A	-	S > N	S > L
		SVMPIII-5											SVMPIII-7						SVMPIII-10													SVSP-1							SVSP-4						SVSP-7	SVSP-10
	ID	684	736	915	1104	1125	1351	1369	1384	1506	1516	1686	150	238	505	990	1396	1403	568	575	587	596	601	806	912	1044	1120	1240	1342	1500	1700	75	132	271	319	546	549	702	411	544	560	640	665	755	779	130	192	211	279
North Mojave	CLP2065	T	C	T	C	T	G	G	C	A	A	C	G	G	G	C	G	G	C	C	G	G	C	A	A	C	A	G	C	C	G	C	T	G	C	G	G	T	T	C	T	A	G	C	C	G	A	A	G
		T	C	T	C	T	G	G	C	A	A	C	C	A	G	T	G	G	C	C	G	G	C	A	A	C	A	G	C	C	G	C	T	G	C	G	G	T	T	C	T	A	G	C	C	G	A	A	G
	CLP2068	T	C	T	C	T	G	G	C	A	A	C	G	G	G	C	G	G	C	C	G	A	A	A	A	C	A	G	T	T	G	C	C	A	T	G	A	C	T	C	T	C	C	C	C	G	A	A	G
		T	C	T	C	T	G	G	C	A	A	C	G	G	G	C	G	G	C	C	G	A	A	A	A	C	A	G	C	C	G	T	T	G	C	G	G	T	T	C	T	C	G	C	C	G	A	A	G
South Mojave	CLP2071	T	C	C	C	C	C	A	C	G	G	C	G	G	G	C	G	G	C	C	G	A	A	A	A	C	A	G	C	C	G	C	T	G	C	G	G	T	T	A	T	C	C	C	C	-	-	-	-
		T	T	C	T	T	C	G	A	G	G	C	C	G	G	C	C	A	C	C	G	G	C	A	A	T	A	G	T	T	G	C	T	G	C	A	G	T	T	C	T	A	G	C	C	-	-	-	-
	CLP2109	T	C	T	C	T	C	G	A	G	G	C	G	G	G	C	G	G	C	C	G	G	C	A	A	C	A	G	C	C	G	C	T	G	C	G	G	T	T	A	T	C	C	C	C	G	A	A	G
		T	T	C	C	T	G	G	C	G	A	C	G	G	G	C	G	G	C	C	G	G	C	A	A	C	A	G	T	C	G	C	T	G	C	A	G	T	T	C	T	A	G	C	C	G	A	A	G
Colorado	CLP2057	T	C	C	C	C	C	G	C	G	G	C	G	G	G	C	G	G	T	C	G	A	A	A	A	C	A	G	C	C	G	C	T	G	C	A	G	T	T	C	T	C	C	C	C	G	A	T	A
		T	C	C	C	C	C	G	C	G	G	C	G	G	G	C	G	G	T	T	G	G	A	G	A	C	G	T	C	C	G	C	C	G	C	G	G	C	T	A	T	C	C	C	C	G	A	T	A
Sonora	CLP2105	T	C	T	C	T	C	G	C	A	A	T	G	G	G	C	G	G	C	C	G	A	A	A	C	C	A	G	C	C	G	C	C	G	C	G	G	C	T	C	C	A	C	C	T	A	G	T	A
		C	C	T	C	C	C	G	A	A	A	T	G	G	G	C	G	G	C	C	G	A	A	A	C	C	A	G	C	C	G	C	C	G	C	G	G	C	T	C	C	A	C	C	T	A	G	T	A
	CLP2137	T	C	T	C	C	C	G	C	A	A	T	G	G	G	C	G	G	C	C	G	G	C	A	A	C	A	G	C	C	G	C	C	G	C	G	G	C	G	C	C	A	C	C	T	A	A	T	A
		T	C	C	T	T	C	G	C	A	A	T	G	G	A	C	G	G	C	C	G	G	C	A	C	C	A	G	C	C	G	C	C	G	C	G	G	C	T	C	T	A	C	T	T	A	A	T	A
	KW1744	T	C	T	C	C	C	G	C	A	A	C	G	G	G	C	G	G	T	C	A	A	A	A	C	C	A	G	C	C	G	C	C	G	C	G	G	C	T	C	T	C	C	C	C	A	A	T	A
		C	C	T	C	T	C	G	C	A	A	T	G	G	G	C	G	G	T	C	A	A	A	A	C	C	A	G	C	C	A	C	C	G	C	G	G	C	T	C	T	C	C	C	C	A	A	T	A
Amino Acid Change		-	-	-	-	-	Q > E	A > T	-	-	V > I	-	K > N	D > N	V > I	-	A > P	S > N	L > F	P > L	R > K	N > S	K > Q	D > G	-	-	N > D	L > V	-	-	R > Q	-	-	D > N	-	-	-	-	S > R	P > T	I > T	L > I	A > G	T > I	P > L	D > N	-	L > M	-
[truncated: 1 more columns]

## Sheet: TableS3
Table S3. List of museum specimens and fang length data
institutionCode	catalogNumber	museumID	Latitude	Longitude	Lineage	Species	Subspecies	In_Out	ImageID	SVL	TL	Sex	RFL	LFL	MFL	IFD	HL	Notes	SVLmm	HLmm	FL_HL	asin_FL_HL	FL_SVL	IFD_HL
MVZ	9567	MVZ9567	31.0001	-114.867	Colorado	Crotalus cerastes	laterorepens	NA	Crotalus_cerastes_MVZ_9567	43.9	3.8	1	5.31	4.84	5.075	7.07	2.24		439	22.4	0.226562	0.992169	0.0115604	0.315625
MVZ	9563	MVZ9563	31.0001	-114.867	Colorado	Crotalus cerastes	laterorepens	NA	Crotalus_cerastes_MVZ_9563	41	3.3	1	5.07	5.9	5.485	4.69	2.316		410	23.16	0.236831	1.01651	0.013378	0.202504
MVZ	9565	MVZ9565	31.0001	-114.867	Colorado	Crotalus cerastes	laterorepens	NA	Crotalus_cerastes_MVZ_9565	43.5	4.4	1	5.23	5.82	5.525	6.61	2.394		435	23.94	0.230785	1.00222	0.0127011	0.276107
MVZ	50174	MVZ50174	31.05	-114.85	Colorado	Crotalus cerastes	laterorepens	NA	Crotalus_cerastes_MVZ_50174	32.7	3	1	4.66	4.4	4.53	4.53	1.946		327	19.46	0.232785	1.00696	0.0138532	0.232785
MVZ	81283	MVZ81283	31.9954	-113.338	Colorado	Crotalus cerastes	laterorepens	NA	Crotalus_cerastes_MVZ_81283	48.5	2.1	2	5.22	5.57	5.395	5.7	2.608		485	26.08	0.206863	0.944346	0.0111237	0.218558
MVZ	63664	MVZ63664	32.6817	-114.624	Colorado	Crotalus cerastes	laterorepens	NA	Crotalus_cerastes_MVZ_63664	41	3	2	4.16	4.73	4.445	5.55	2.001		410	20.01	0.222139	0.981565	0.0108415	0.277361
MVZ	63665	MVZ63665	32.6817	-114.624	Colorado	Crotalus cerastes	laterorepens	NA	Crotalus_cerastes_MVZ_63665	45.7	4.2	1	5.49	5.42	5.455	5.48	2.208		457	22.08	0.247056	1.04039	0.0119365	0.248188
UIMNH	37851	UIMNH37851	32.7253	-114.624	Colorado	Crotalus cerastes	laterorepens	NA	Crotalus_cerastes_laterorepens_UIMNH_37851	47.8	3.6	1	6.13	5.28	5.705	7.75	2.489		478	24.89	0.229209	0.998477	0.0119351	0.31137
MVZ	56525	MVZ56525	32.7757	-114.374	Colorado	Crotalus cerastes	laterorepens	NA	Crotalus_cerastes_MVZ_56525	39.3	3.8	1	5.66	6.64	6.15	5.01	2.392		393	23.92	0.257107	1.06353	0.0156489	0.209448
UIMNH	84779	UIMNH84779	32.858	-114.36	Colorado	Crotalus cerastes	laterorepens	NA	Crotalus_cerastes_laterorepens_UIMNH_84779	48.5	4.2	1	5.68	5.56	5.62	6.18	2.469		485	24.69	0.227623	0.994699	0.0115876	0.250304
MVZ	80175	MVZ80175	32.9144	-115.073	Colorado	Crotalus cerastes	laterorepens	NA	Crotalus_cerastes_MVZ_80175	57.7	5.1	1	6.79	6.57	6.68	7.42	2.725		577	27.25	0.245138	1.03593	0.0115771	0.272294
MVZ	170809	MVZ170809	33.0575	-115.75	Colorado	Crotalus cerastes	laterorepens	NA	Crotalus_cerastes_MVZ_170809	35	2.6	1	4.31	4.68	4.495	5.45	1.881		350	18.81	0.238969	1.02153	0.0128429	0.289739
UIMNH	84777	UIMNH84777	33.0975	-116.645	Colorado	Crotalus cerastes	laterorepens	NA	Crotalus_cerastes_laterorepens_UIMNH_84777	53.4	4.7	1	5.47	5.87	5.67	7.23	2.543		534	25.43	0.222965	0.983551	0.010618	0.28431
MVZ	988	MVZ988	33.1114	-115.662	Colorado	Crotalus cerastes	laterorepens	NA	Crotalus_cerastes_MVZ_988	36.6	4.3	1	5.83	5.62	5.725	4.98	2.412		366	24.12	0.237355	1.01774	0.0156421	0.206468
MVZ	173051	MVZ173051	33.1407	-116.269	Colorado	Crotalus cerastes	laterorepens	NA	Crotalus_cerastes_MVZ_173051	53.5	3.2	2	6.33	6.29	6.31	6.35	2.655		535	26.55	0.237665	1.01847	0.0117944	0.239171
MVZ	173702	MVZ173702	33.2564	-116.288	Colorado	Crotalus cerastes	laterorepens	NA	Crotalus_cerastes_MVZ_173702	52.8	3.3	2	6.84	6.85	6.845	6.41	2.603		528	26.03	0.262966	1.07689	0.012964	0.246254
MVZ	27027	MVZ27027	33.2606	-116.375	Colorado	Crotalus cerastes	laterorepens	NA	Crotalus_cerastes_MVZ_27027	61.5	5.5	1	6.18	6.48	6.33	6.6	3.057		615	30.57	0.207066	0.944845	0.0102927	0.215898
MVZ	67797	MVZ67797	33.369	-116.052	Colorado	Crotalus cerastes	laterorepens	NA	Crotalus_cerastes_MVZ_67797	57.8	4.4	1	6.72	6.67	6.695	7.69	3.168		578	31.68	0.211332	0.955334	0.011583	0.24274
MVZ	233730	MVZ233730	33.5144	-113.749	Colorado	Crotalus cerastes	laterorepens	NA	Crotalus_cerastes_MVZ_233730	53.3	4.2	1	5.24	5.62	5.43	5.93	2.552		533	25.52	0.212774	0.958863	0.0101876	0.232367
CAS	259893	CAS259893	33.9046	-116.675	North Mojave	Crotalus cerastes	cerastes	NA	Crotalus_cerastes_CAS_259893	31	2.6	1	4.18	3.98	4.08	5.91	1.922	CLP 2057	310	19.22	0.212279	0.957652	0.0131613	0.307492
UIMNH	84775	UIMNH84775	33.9304	-116.828	North Mojave	Crotalus cerastes	cerastes	NA	Crotalus_cerastes_laterorepens_UIMNH_84775	34.4	3.3	1	4.68	3.75	4.215	4.95	2.13		344	21.3	0.197887	0.922003	0.0122529	0.232394
MVZ	11426	MVZ11426	34.6312	-117.862	North Mojave	Crotalus cerastes	cerastes	NA	Crotalus_cerastes_MVZ_11426	55.2	5.6	1	6.02	6.02	6.02	6.09	2.623		552	26.23	0.229508	0.99919	0.0109058	0.232177
MVZ	11425	MVZ11425	34.6312	-117.862	North Mojave	Crotalus cerastes	cerastes	NA	Crotalus_cerastes_MVZ_11425	37.9	3.3	1	4.72	4.81	4.765	4.91	2.974		379	29.74	0.160222	0.823639	0.0125726	0.165098
CAS	259901	CAS259901	34.7284	-117.426	North Mojave	Crotalus cerastes	cerastes	NA	Crotalus_cerastes_CAS_259901	43.5	4.5	1	5.15	5.98	5.565	7.17	2.584	CLP 2065	435	25.84	0.215364	0.965176	0.0127931	0.277477
MVZ	175818	MVZ175818	35.1699	-117.838	North Mojave	Crotalus cerastes	cerastes	NA	Crotalus_cerastes_MVZ_175818	57	4.2	1	5.73	6.46	6.095	6.53	2.947		570	29.47	0.20682	0.94424	0.010693	0.221581
MVZ	233723	MVZ233723	35.1731	-117.828	North Mojave	Crotalus cerastes	cerastes	NA	Crotalus_cerastes_MVZ_233723	47.7	4.4	1	4.56	5.25	4.905	6.02	2.522		477	25.22	0.194489	0.913444	0.010283	0.238699
MVZ	193468	MVZ193468	35.2128	-117.985	North Mojave	Crotalus cerastes	cerastes	NA	Crotalus_cerastes_MVZ_193468	56	3.1	2	5.68	5.64	5.66	6.52	2.442		560	24.42	0.231777	1.00458	0.0101071	0.266994
MVZ	269752	MVZ269752	35.6902	-117.383	North Mojave	Crotalus cerastes	cerastes	NA	Crotalus_cerastes_MVZ_269752	35	3.2	1	4.67	4.52	4.595	4.77	2.07		350	20.7	0.221981	0.981184	0.0131286	0.230435
CAS	259905	CAS259905	33.6691	-115.802	South Mojave	Crotalus cerastes	cerastes	NA	Crotalus_cerastes_CAS_259905	36.6	2.7	2	4.59	5.56	5.075	4.21	2.137	CLP 2071	366	21.37	0.237482	1.01804	0.0138661	0.197005
MVZ	233726	MVZ233726	33.8344	-113.497	South Mojave	Crotalus cerastes	cerastes	NA	Crotalus_cerastes_MVZ_233726	56	5.1	1	5.11	4.71	4.91	6.28	2.701		560	27.01	0.181785	0.880934	0.00876786	0.232506
CAS	259906	CAS259906	33.9028	-115.842	South Mojave	Crotalus cerastes	cerastes	NA	Crotalus_cerastes_CAS_259906	42	2.9	2	5.52	NA	5.52	5.82	2.155	CLP 2072	420	21.55	0.256148	1.06134	0.0131429	0.27007
MVZ	233658	MVZ233658	33.9929	-113.84	South Mojave	Crotalus cerastes	cerastes	NA	Crotalus_cerastes_MVZ_233658	53.3	4.3	1	5.47	5.9	5.685	6.89	2.483		533	24.83	0.228957	0.997879	0.010666	0.277487
MVZ	233731	MVZ233731	34.0027	-113.966	South Mojave	Crotalus cerastes	cerastes	NA	Crotalus_cerastes_MVZ_233731	56.5	5.4	1	5.51	5.8	5.655	6.68	2.686		565	26.86	0.210536	0.953383	0.0100088	0.248697
UIMNH	84774	UIMNH84774	34.0109	-114.596	South Mojave	Crotalus cerastes	cerastes	NA	Crotalus_cerastes_laterorepens_UIMNH_84774	30.1	2.2	2	4.02	3.65	3.835	4.44	1.698		301	16.98	0.225854	0.990476	0.0127409	0.261484
MVZ	233774	MVZ233774	34.077	-113.88	South Mojave	Crotalus cerastes	cerastes	NA	Crotalus_cerastes_MVZ_233774	49.8	4.1	1	4.59	4.98	4.785	6.09	2.4		498	24	0.199375	0.925732	0.00960843	0.25375
MVZ	233787	MVZ233787	34.1192	-113.916	South Mojave	Crotalus cerastes	cerastes	NA	Crotalus_cerastes_MVZ_233787	50.2	4.1	1	5.1	5.28	5.19	5.38	2.349		502	23.49	0.220945	0.97869	0.0103386	0.229034
CAS	259917	CAS259917	34.3154	-116.476	South Mojave	Crotalus cerastes	cerastes	NA	Crotalus_cerastes_CAS_259917	38.7	2.9	2	4.82	5.3	5.06	5.77	2.206	CLP 2109	387	22.06	0.229374	0.998872	0.0130749	0.261559
CAS	259903	CAS259903	34.4329	-116.809	South Mojave	Crotalus cerastes	cerastes	NA	Crotalus_cerastes_CAS_259903	38.1	4	1	5.43	4.84	5.135	5.57	2.091	CLP 2068	381	20.91	0.245576	1.03695	0.0134777	0.26638
MVZ	264743	MVZ264743	34.6145	-115.661	South Mojave	Crotalus cerastes	cerastes	NA	Crotalus_cerastes_MVZ_264743	38.3	3.1	1	4.18	4.9	4.54	5.23	2.051		383	20.51	0.221355	0.979679	0.0118538	0.254998
MVZ	264741	MVZ264741	34.6944	-115.677	South Mojave	Crotalus cerastes	cerastes	NA	Crotalus_cerastes_MVZ_264741	52.8	5.2	1	6.29	5.92	6.105	6.51	2.628		528	26.28	0.232306	1.00583	0.0115625	0.247717
MVZ	76500	MVZ76500	28.823	-111.941	Sonora	Crotalus cerastes	cercobombus	NA	Crotalus_cerastes_MVZ_76500	62.5	5.6	1	7.21	6.52	6.865	7	2.755		625	27.55	0.249183	1.04531	0.010984	0.254083
UIMNH	53163	UIMNH53163	31.8805	-112.817	Sonora	Crotalus cerastes	cercobombus	NA	Crotalus_cerastes_cercobombus_UIMNH_53163	54	2.8	2	6.96	6.69	6.825	6.82	2.829		540	28.29	0.241251	1.02687	0.0126389	0.241075
MVZ	76406	MVZ76406	31.882	-112.876	Sonora	Crotalus cerastes	cercobombus	NA	Crotalus_cerastes_MVZ_76406	35.5	2	2	4.55	4.65	4.6	4.12	2.041		355	20.41	0.22538	0.989341	0.0129577	0.201862
MVZ	81282	MVZ81282	31.8888	-112.812	Sonora	Crotalus cerastes	cercobombus	NA	Crotalus_cerastes_MVZ_81282	47	3.2	2	5.86	6.45	6.155	4.85	2.552		470	25.52	0.241183	1.02671	0.0130957	0.190047
UIMNH	53164	UIMNH53164	31.9504	-112.803	Sonora	Crotalus cerastes	cercobombus	NA	Crotalus_cerastes_cercobombus_UIMNH_53164	41	4	1	5.94	5.87	5.905	5.63	2.266		410	22.66	0.260591	1.07149	0.0144024	0.248455
MVZ	206954	MVZ206954	32.2093	-111.218	Sonora	Crotalus cerastes	cercobombus	NA	Crotalus_cerastes_MVZ_206954	54.5	3.6	1	5.76	5.85	5.805	5.52	2.395		545	23.95	0.24238	1.02951	0.0106514	0.23048
MVZ	76671	MVZ76671	32.2277	-112.708	Sonora	Crotalus cerastes	cercobombus	NA	Crotalus_cerastes_MVZ_76671	39.9	2.3	1	4.83	5.17	5	4.39	1.92		399	19.2	0.260417	1.07109	0.0125313	0.228646
MVZ	58630	MVZ58630	32.2501	-112.716	Sonora	Crotalus cerastes	cercobombus	NA	Crotalus_cerastes_MVZ_58630	31.5	2.7	1	4.19	4.53	4.36	5.04	1.942	paratype	315	19.42	0.224511	0.98726	0.0138413	0.259526
MVZ	233635	MVZ233635	32.3786	-111.331	Sonora	Crotalus cerastes	cercobombus	NA	Crotalus_cerastes_MVZ_233635	39.1	3.4	1	4.37	5.45	4.91	4.93	2.16		391	21.6	0.227315	0.993965	0.0125575	0.228241
MVZ	233633	MVZ233633	32.4527	-111.373	Sonora	Crotalus cerastes	cercobombus	NA	Crotalus_cerastes_MVZ_233633	58.8	4	2	5.88	6.16	6.02	6.46	2.815		588	28.15	0.213854	0.961499	0.0102381	0.229485
MVZ	196879	MVZ196879	32.4653	-111.304	Sonora	Crotalus cerastes	cercobombus	NA	Crotalus_cerastes_MVZ_196879	43.7	2.8	2	4.77	5.19	4.98	3.7	2.12		437	21.2	0.234906	1.01197	0.0113959	0.174528
MVZ	233639	MVZ233639	33.0041	-112.419	Sonora	Crotalus cerastes	cercobombus	NA	Crotalus_cerastes_MVZ_233639	52.8	5	1	5.16	5.66	5.41	6.35	2.703		528	27.03	0.200148	0.927665	0.0102462	0.234924
UIMNH	41288	UIMNH41288	33.0551	-112.666	Sonora	Crotalus cerastes	cercobombus	NA	Crotalus_cerastes_cercobombus_UIMNH_41288	31.2	3.1	1	4.87	4.71	4.79	4.46	1.949		312	19.49	0.245767	1.03739	0.0153526	0.228835
MVZ	72335	MVZ72335	33.2162	-112.047	Sonora	Crotalus cerastes	cercobombus	NA	Crotalus_cerastes_MVZ_72335	36.6	3.2	1	4.58	4.61	4.595	4.63	1.939		366	19.39	0.236978	1.01685	0.0125546	0.238783
